# Supplementary material for: Synthesis, characterization and antiproliferative activity on mesothelioma cell lines of bis(carboxylato)platinum(iv) complexes based on picoplatin
Source: Royal Society of Chemistry journal article supplement (doi:10.1039/c2dt11874b), 2012-01-01
Supplement: c2dt11874b.pdf [file c2dt11874b.pdf]

**Synthesis, characterization and antiproliferative activity on  
mesothelioma cell lines of bis(carboxylato)platinum(IV) complexes  
based on picoplatin.**

Mauro Ravera<sup>a</sup> • Elisabetta Gabano<sup>a</sup> • Ilaria Zanellato<sup>a</sup> • Ilaria Bonarrigo<sup>a</sup> • Esther  
Escribano<sup>b</sup> • Virtudes Moreno<sup>b</sup> • Mercè Font-Bardia<sup>c,d</sup> • Teresa Calvet<sup>c</sup> • Domenico  
Osella<sup>\*a</sup>

<sup>a</sup> *Dipartimento di Scienze dell'Ambiente e della Vita, Università del Piemonte Orientale "Amedeo Avogadro", Viale Michel 11, 15121, Alessandria, Italy. E-mail: [domenico.osella@mfn.unipmn.it](mailto:domenico.osella@mfn.unipmn.it)*

<sup>b</sup> *Departament de Química Inorgànica, Universitat de Barcelona, Martí i Franquès 1-11, 08028, Barcelona, Spain*

<sup>c</sup> *Cristal·lografia, Mineralogia i Dipòsits Minerals, Universitat de Barcelona, Martí i Franquès s/n, 08028 Barcelona, Spain*

<sup>d</sup> *Unitat de Difracció de RX, Centre Científic i Tecnològic de la Universitat de Barcelona (CCITUB), Solé i Sabarís 1-3, 08028 Barcelona, Spain*

**SUPPLEMENTARY MATERIAL**

**Content:**

**Table S1** Atomic coordinates ( $\times 10^4$ ) and equivalent isotropic displacement parameters ( $\text{\AA}^2 \times 10^3$ ) for complex **2**.  $U(\text{eq})$  is defined as one third of the trace of the orthogonalized  $U_{ij}$  tensor.

**Table S2** Bond lengths ( $\text{\AA}$ ) and angles ( $^\circ$ ) for complex **2**.

**Table S3** Anisotropic displacement parameters ( $\text{\AA}^2 \times 10^3$ ) for complex **2**. The anisotropic displacement factor exponent takes the form:  $-2 \pi^2 [ h^2 a^{*2} U_{11} + \dots + 2 h k a^* b^* U_{12} ]$

**Table S4** Hydrogen coordinates ( $\times 10^4$ ) and isotropic displacement parameters ( $\text{\AA}^2 \times 10^3$ )  
for complex **2**.

**Table S5** Hydrogen bonds for complex **2** ( $\text{\AA}$  and  $^\circ$ ).

**Table S1** Atomic coordinates ( $\times 10^4$ ) and equivalent isotropic displacement parameters ( $\text{\AA}^2 \times 10^3$ ) for complex **2**.  $U(\text{eq})$  is defined as one third of the trace of the orthogonalized  $U_{ij}$  tensor.

|       | <b>x</b> | <b>y</b> | <b>z</b> | <b>U(eq)</b> |
|-------|----------|----------|----------|--------------|
| Pt    | 2621(1)  | 1886(1)  | 4758(1)  | 33(1)        |
| Cl(1) | 560(1)   | 621(1)   | 4258(1)  | 45(1)        |
| Cl(2) | 3191(1)  | 97(1)    | 4111(1)  | 48(1)        |
| O(1)  | 1783(3)  | 3389(4)  | 3886(2)  | 44(1)        |
| O(2)  | 3302(3)  | 188(3)   | 5547(1)  | 42(1)        |
| O(3)  | 3619(3)  | 4302(4)  | 3888(2)  | 55(1)        |
| O(4)  | 4620(4)  | 1977(4)  | 6416(2)  | 54(1)        |
| N(1)  | 2037(3)  | 3448(4)  | 5334(2)  | 38(1)        |
| N(2)  | 4485(3)  | 2826(4)  | 5168(2)  | 40(1)        |
| C(1)  | 2422(4)  | 4152(6)  | 3605(2)  | 50(1)        |
| C(2)  | 1513(6)  | 4866(10) | 2877(3)  | 82(2)        |
| C(3)  | 1834(18) | 6550(20) | 2718(9)  | 88(4)        |
| C(3') | 2281(16) | 5740(20) | 2559(8)  | 92(4)        |
| C(4)  | 4203(3)  | 578(5)   | 6220(2)  | 39(1)        |
| C(5)  | 4611(5)  | -931(7)  | 6699(3)  | 64(1)        |
| C(6)  | 5818(7)  | -629(10) | 7404(3)  | 93(2)        |
| C(7)  | 2115(4)  | 5122(5)  | 5379(2)  | 43(1)        |
| C(8)  | 1576(4)  | 5990(6)  | 5746(2)  | 48(1)        |
| C(9)  | 1004(4)  | 5146(6)  | 6079(2)  | 53(1)        |
| C(10) | 956(4)   | 3418(6)  | 6048(2)  | 48(1)        |
| C(11) | 1472(4)  | 2617(5)  | 5671(2)  | 44(1)        |
| C(12) | 2748(5)  | 6114(6)  | 5046(3)  | 60(1)        |

**Table S2** Bond lengths (Å) and angles (°) for complex **2**.

|              |            |
|--------------|------------|
| Pt-O(2)      | 2.006(3)   |
| Pt-O(1)      | 2.025(3)   |
| Pt-N(2)      | 2.033(3)   |
| Pt-N(1)      | 2.087(3)   |
| Pt-Cl(2)     | 2.3012(10) |
| Pt-Cl(1)     | 2.3151(13) |
| O(1)-C(1)    | 1.312(5)   |
| O(2)-C(4)    | 1.340(4)   |
| O(3)-C(1)    | 1.217(5)   |
| O(4)-C(4)    | 1.207(5)   |
| N(1)-C(7)    | 1.339(5)   |
| N(1)-C(11)   | 1.362(5)   |
| N(2)-H(2A)   | 0.8900     |
| N(2)-H(2B)   | 0.8900     |
| N(2)-H(2C)   | 0.8900     |
| C(1)-C(2)    | 1.504(7)   |
| C(2)-C(3)    | 1.477(17)  |
| C(2)-C(3')   | 1.529(17)  |
| C(2)-H(2D)   | 0.9700     |
| C(2)-H(2E)   | 0.9700     |
| C(2)-H(2D')  | 0.9700     |
| C(2)-H(2E')  | 0.9700     |
| C(3)-H(3A)   | 0.9610     |
| C(3)-H(3B)   | 0.9594     |
| C(3)-H(3C)   | 0.9606     |
| C(3)-H(3A')  | 1.2796     |
| C(3)-H(3B')  | 1.0053     |
| C(3')-H(3A)  | 1.2610     |
| C(3')-H(3C)  | 0.9419     |
| C(3')-H(3A') | 0.9605     |
| C(3')-H(3B') | 0.9589     |
| C(3')-H(3C') | 0.9606     |
| C(4)-C(5)    | 1.502(6)   |
| C(5)-C(6)    | 1.494(8)   |
| C(5)-H(5A)   | 0.9700     |
| C(5)-H(5B)   | 0.9700     |
| C(6)-H(6A)   | 0.9600     |
| C(6)-H(6B)   | 0.9600     |
| C(6)-H(6C)   | 0.9600     |
| C(7)-C(8)    | 1.403(5)   |
| C(7)-C(12)   | 1.479(7)   |
| C(8)-C(9)    | 1.365(6)   |
| C(8)-H(8)    | 0.9300     |
| C(9)-C(10)   | 1.381(7)   |
| C(9)-H(9)    | 0.9300     |

|                   |            |
|-------------------|------------|
| C(10)-C(11)       | 1.375(5)   |
| C(10)-H(10)       | 0.9300     |
| C(11)-H(11)       | 0.9300     |
| C(12)-H(12A)      | 0.9600     |
| C(12)-H(12B)      | 0.9600     |
| C(12)-H(12C)      | 0.9600     |
|                   |            |
| O(2)-Pt-O(1)      | 173.23(11) |
| O(2)-Pt-N(2)      | 89.31(12)  |
| O(1)-Pt-N(2)      | 96.28(12)  |
| O(2)-Pt-N(1)      | 90.60(12)  |
| O(1)-Pt-N(1)      | 92.61(12)  |
| N(2)-Pt-N(1)      | 96.06(13)  |
| O(2)-Pt-Cl(2)     | 88.86(8)   |
| O(1)-Pt-Cl(2)     | 87.69(9)   |
| N(2)-Pt-Cl(2)     | 86.18(10)  |
| N(1)-Pt-Cl(2)     | 177.68(9)  |
| O(2)-Pt-Cl(1)     | 89.22(8)   |
| O(1)-Pt-Cl(1)     | 84.89(9)   |
| N(2)-Pt-Cl(1)     | 175.13(10) |
| N(1)-Pt-Cl(1)     | 88.59(9)   |
| Cl(2)-Pt-Cl(1)    | 89.15(4)   |
| C(1)-O(1)-Pt      | 125.3(3)   |
| C(4)-O(2)-Pt      | 122.0(2)   |
| C(7)-N(1)-C(11)   | 118.7(3)   |
| C(7)-N(1)-Pt      | 127.5(3)   |
| C(11)-N(1)-Pt     | 113.7(3)   |
| Pt-N(2)-H(2A)     | 109.5      |
| Pt-N(2)-H(2B)     | 109.5      |
| H(2A)-N(2)-H(2B)  | 109.5      |
| Pt-N(2)-H(2C)     | 109.5      |
| H(2A)-N(2)-H(2C)  | 109.5      |
| H(2B)-N(2)-H(2C)  | 109.5      |
| O(3)-C(1)-O(1)    | 125.2(4)   |
| O(3)-C(1)-C(2)    | 121.9(4)   |
| O(1)-C(1)-C(2)    | 112.9(4)   |
| C(3)-C(2)-C(1)    | 117.2(8)   |
| C(1)-C(2)-C(3')   | 111.8(7)   |
| C(3)-C(2)-H(2D)   | 108.0      |
| C(1)-C(2)-H(2D)   | 108.0      |
| C(3)-C(2)-H(2E)   | 108.0      |
| C(1)-C(2)-H(2E)   | 108.0      |
| H(2D)-C(2)-H(2E)  | 107.3      |
| C(1)-C(2)-H(2D')  | 109.3      |
| C(3')-C(2)-H(2D') | 109.3      |
| C(1)-C(2)-H(2E')  | 109.3      |

|                     |          |
|---------------------|----------|
| C(3')-C(2)-H(2E')   | 109.3    |
| C(2D')-C(2)-H(2E')  | 107.9    |
| C(2)-C(3)-H(3A)     | 109.5    |
| C(2)-C(3)-H(3B)     | 109.6    |
| H(3A)-C(3)-H(3B)    | 109.4    |
| C(2)-C(3)-H(3C)     | 109.5    |
| H(3A)-C(3)-H(3C)    | 109.4    |
| H(3B)-C(3)-H(3C)    | 109.5    |
| C(2)-C(3)-H(3B')    | 110.5    |
| H(3A)-C(3)-H(3B')   | 107.9    |
| H(3B)-C(3)-H(3B')   | 109.9    |
| C(2)-C(3')-H(3C)    | 106.7    |
| C(2)-C(3')-H(3A')   | 109.5    |
| C(2)-C(3')-H(3B')   | 109.4    |
| H(3A')-C(3')-H(3B') | 109.5    |
| C(2)-C(3')-H(4C')   | 109.4    |
| H(3A')-C(3')-H(4C') | 109.4    |
| H(3B')-C(3')-H(4C') | 109.5    |
| O(4)-C(4)-O(2)      | 123.9(3) |
| O(4)-C(4)-C(5)      | 124.4(4) |
| O(2)-C(4)-C(5)      | 111.7(3) |
| C(6)-C(5)-C(4)      | 112.9(5) |
| C(6)-C(5)-H(5A)     | 109.0    |
| C(4)-C(5)-H(5A)     | 109.0    |
| C(6)-C(5)-H(5B)     | 109.0    |
| C(4)-C(5)-H(5B)     | 109.0    |
| H(5A)-C(5)-H(5B)    | 107.8    |
| C(5)-C(6)-H(6A)     | 109.5    |
| C(5)-C(6)-H(6B)     | 109.5    |
| H(6A)-C(6)-H(6B)    | 109.5    |
| C(5)-C(6)-H(6C)     | 109.5    |
| H(6A)-C(6)-H(6C)    | 109.5    |
| H(6B)-C(6)-H(6C)    | 109.5    |
| N(1)-C(7)-C(8)      | 120.1(4) |
| N(1)-C(7)-C(12)     | 122.0(4) |
| C(8)-C(7)-C(12)     | 117.9(4) |
| C(9)-C(8)-C(7)      | 120.8(4) |
| C(9)-C(8)-H(8)      | 119.6    |
| C(7)-C(8)-H(8)      | 119.6    |
| C(8)-C(9)-C(10)     | 119.1(4) |
| C(8)-C(9)-H(9)      | 120.5    |
| C(10)-C(9)-H(9)     | 120.5    |
| C(11)-C(10)-C(9)    | 118.3(4) |
| C(11)-C(10)-H(10)   | 120.9    |
| C(9)-C(10)-H(10)    | 120.9    |
| N(1)-C(11)-C(10)    | 123.1(4) |

|                     |       |
|---------------------|-------|
| N(1)-C(11)-H(11)    | 118.5 |
| C(10)-C(11)-H(11)   | 118.5 |
| C(7)-C(12)-H(12A)   | 109.5 |
| C(7)-C(12)-H(12B)   | 109.5 |
| H(12A)-C(12)-H(12B) | 109.5 |
| C(7)-C(12)-H(12C)   | 109.5 |
| H(12A)-C(12)-H(12C) | 109.5 |
| H(12B)-C(12)-H(12C) | 109.5 |

**Table S3** Anisotropic displacement parameters ( $\text{\AA}^2 \times 10^3$ ) for complex **2**. The anisotropic displacement factor exponent takes the form:  $-2 \pi^2 [ h^2 a^{*2} U_{11} + \dots + 2 h k a^* b^* U_{12} ]$

|       | $U_{11}$ | $U_{22}$ | $U_{33}$ | $U_{23}$ | $U_{13}$ | $U_{12}$ |
|-------|----------|----------|----------|----------|----------|----------|
| Pt    | 33(1)    | 32(1)    | 36(1)    | 0(1)     | 18(1)    | 0(1)     |
| Cl(1) | 42(1)    | 44(1)    | 49(1)    | -4(1)    | 22(1)    | -5(1)    |
| Cl(2) | 51(1)    | 47(1)    | 48(1)    | -2(1)    | 26(1)    | 5(1)     |
| O(1)  | 44(1)    | 44(1)    | 43(1)    | 4(1)     | 20(1)    | 4(1)     |
| O(2)  | 44(1)    | 37(1)    | 43(1)    | 1(1)     | 21(1)    | -2(1)    |
| O(3)  | 57(2)    | 59(2)    | 55(2)    | 7(1)     | 31(1)    | -1(1)    |
| O(4)  | 60(2)    | 49(2)    | 50(2)    | -4(1)    | 25(1)    | -5(1)    |
| N(1)  | 38(1)    | 37(1)    | 42(1)    | -1(1)    | 21(1)    | 2(1)     |
| N(2)  | 37(1)    | 39(2)    | 44(2)    | 1(1)     | 19(1)    | -2(1)    |
| C(1)  | 52(2)    | 48(2)    | 48(2)    | 6(2)     | 24(2)    | 2(2)     |
| C(2)  | 76(4)    | 92(5)    | 66(3)    | 18(3)    | 27(3)    | -3(3)    |
| C(3)  | 96(11)   | 69(9)    | 82(9)    | 7(7)     | 32(8)    | -7(8)    |
| C(3') | 88(10)   | 107(13)  | 68(7)    | 22(8)    | 27(7)    | 1(8)     |
| C(4)  | 35(2)    | 45(2)    | 36(2)    | 2(1)     | 18(1)    | 1(1)     |
| C(5)  | 70(3)    | 62(3)    | 53(2)    | 7(2)     | 25(2)    | -2(2)    |
| C(6)  | 90(4)    | 101(6)   | 69(3)    | 17(3)    | 23(3)    | -7(4)    |
| C(7)  | 41(2)    | 40(2)    | 48(2)    | -5(1)    | 21(2)    | -1(1)    |
| C(8)  | 44(2)    | 43(2)    | 55(2)    | -7(2)    | 24(2)    | 2(2)     |
| C(9)  | 49(2)    | 55(3)    | 56(2)    | -8(2)    | 28(2)    | 1(2)     |
| C(10) | 46(2)    | 54(2)    | 45(2)    | -5(2)    | 24(2)    | -2(2)    |
| C(11) | 45(2)    | 40(2)    | 51(2)    | -1(2)    | 27(2)    | 2(2)     |
| C(12) | 66(3)    | 44(3)    | 80(3)    | -4(2)    | 43(2)    | -1(2)    |



**Table S4** Hydrogen coordinates ( $\times 10^4$ ) and isotropic displacement parameters ( $\text{\AA}^2 \times 10^3$ )

for complex **2**.

|        | <b>x</b> | <b>y</b> | <b>z</b> | <b>U(eq)</b> |
|--------|----------|----------|----------|--------------|
| H(2A)  | 4481     | 3678     | 4899     | 48           |
| H(2B)  | 5026     | 2028     | 5172     | 48           |
| H(2C)  | 4763     | 3182     | 5612     | 48           |
| H(2D)  | 1493     | 4093     | 2523     | 98           |
| H(2E)  | 625      | 4904     | 2815     | 98           |
| H(2D') | 914      | 5662     | 2912     | 98           |
| H(2E') | 984      | 3970     | 2560     | 98           |
| H(3A)  | 1341     | 6747     | 2212     | 105          |
| H(3B)  | 1604     | 7380     | 2962     | 105          |
| H(3C)  | 2765     | 6613     | 2875     | 105          |
| H(3A') | 1670     | 6192     | 2099     | 111          |
| H(3B') | 2802     | 6630     | 2870     | 111          |
| H(4C') | 2853     | 4946     | 2508     | 111          |
| H(5A)  | 3886     | -1255    | 6779     | 77           |
| H(5B)  | 4782     | -1854    | 6462     | 77           |
| H(6A)  | 6046     | -1636    | 7684     | 140          |
| H(6B)  | 5643     | 251      | 7652     | 140          |
| H(6C)  | 6540     | -306     | 7330     | 140          |
| H(8)   | 1609     | 7155     | 5763     | 57           |
| H(9)   | 652      | 5727     | 6323     | 63           |
| H(10)  | 585      | 2811     | 6276     | 57           |
| H(11)  | 1432     | 1453     | 5644     | 53           |
| H(12A) | 3065     | 5374     | 4810     | 91           |
| H(12B) | 3476     | 6738     | 5407     | 91           |
| H(12C) | 2111     | 6875     | 4703     | 91           |

**Table S5** Hydrogen bonds for complex **2** (Å and °).

|       | D-H...A |       |     |              | d(D-H) | d(H...A) | d(D...A) | <(DHA) |
|-------|---------|-------|-----|--------------|--------|----------|----------|--------|
| Intra | N2      | --H2A | O3  |              | 0.89   | 1.96     | 2.691(5) | 139    |
| Intra | N2      | --H2C | O4  |              | 0.89   | 2.05     | 2.692(5) | 128    |
| Inter | N2      | --H2B | Cl2 | [1-x,1-y,-z] | 0.89   | 2.53     | 3.317(4) | 148    |
| Inter | N2      | --H2C | O3  | [1-x,1-y,-z] | 0.89   | 2.59     | 3.135(5) | 120    |
